# Supplementary material for: Characterization of cytoplasmic cyclin D1 as a marker of invasiveness in cancer
Source: PubMed Central journal article supplement (PMC5053626; doi:10.18632/oncotarget.8876), 2016-04-20
Supplement: oncotarget-07-26979-s001.pdf [file oncotarget-07-26979-s001.pdf]

# **Characterization of cytoplasmic cyclin D1 as a marker of invasiveness in cancer**

## **Supplementary Material**

### **Clonogenic assay**

MFE cells were infected with the indicated lentiviruses and three days after the infection seeded onto 6-well plates at a density of  $1 \times 10^3$  cells per well. Cells were incubated for 15 days and colonies were stained with crystal violet for 30 minutes and fixed with 4% paraformaldehyde for 5 minutes and maintained in 2 mL PBS. Colonies were scored using the Quantity One program (Colony Counting Quick Guide) and two replicate dishes were counted for each condition.

### **Colony Formation Assay in soft agar**

Three days after infection Ccnd1 or Ccnd1-CAAX-transduced cells were trypsinized and resuspended in 0.3% agar diluted in medium at concentration of  $3 \times 10^3$  cells/ml. One ml of cell suspension was layered on a 0.6% agar-coated 35 mm culture dish. Dishes were incubated at 37°C with saturating humidity and 5% CO<sub>2</sub> for 15 days. Colonies of three independent experiments were visualized by staining with Mitotracker (MTT). Colonies were counted with Quantity One software (Bio-Rad).

### **Growth and viability assay.**

MFE cells were infected with the indicated lentiviruses. Three days after the infection, cells were plated in 24-well plates at  $5 \times 10^3$  cells/cm<sup>2</sup>. After overnight incubation, cells of two independent experiments were counted in hemocytometer every 24 h. To assay the viability cells were diluted in Trypan Blue dye.

A Breast

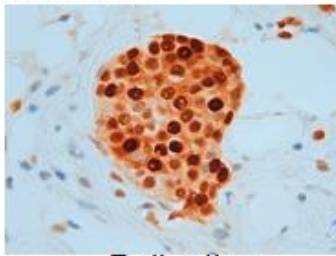

Collective

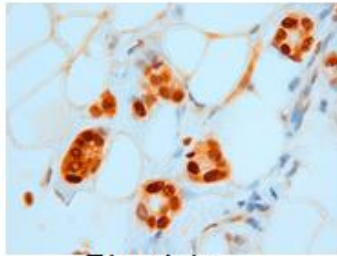

Glandular

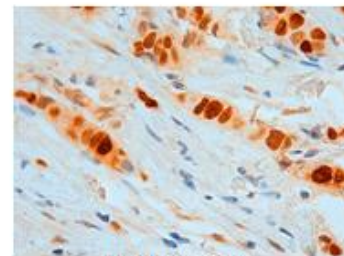

Indian-file

B

Colon

Budding

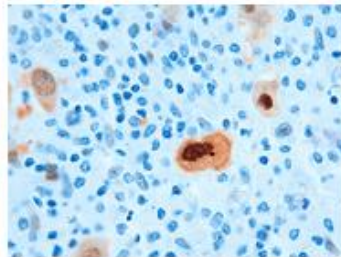

Collective

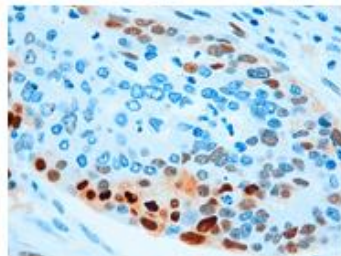

Glandular

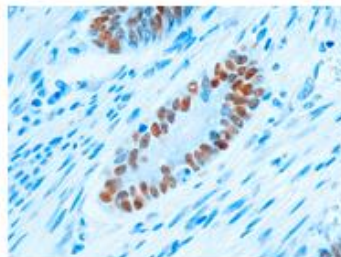

Pushing

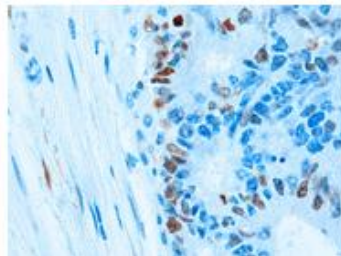

C

Prostate

Gleason 3

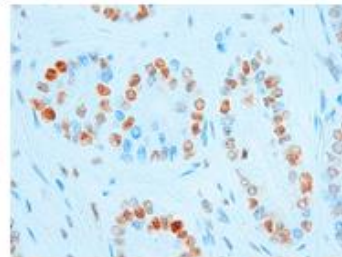

Gleason 4

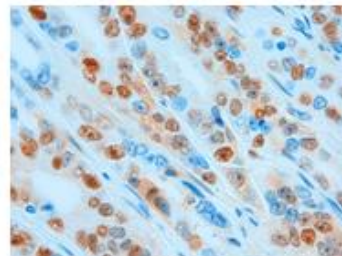

Gleason 5

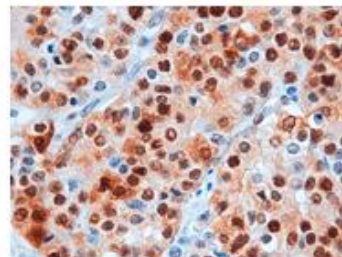

pT3

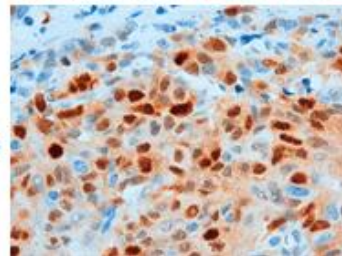

**Supplementary Figure S1. Membranous-cytoplasmic Ccnd1 expression at the invasive front is higher in peripheral cells in large invasive cell clusters or in specific types of invasion.** Representative images showing Ccnd1 expression at the invasive front in different types of invasion in breast, prostatic and colon carcinomas. See also Figure 1.

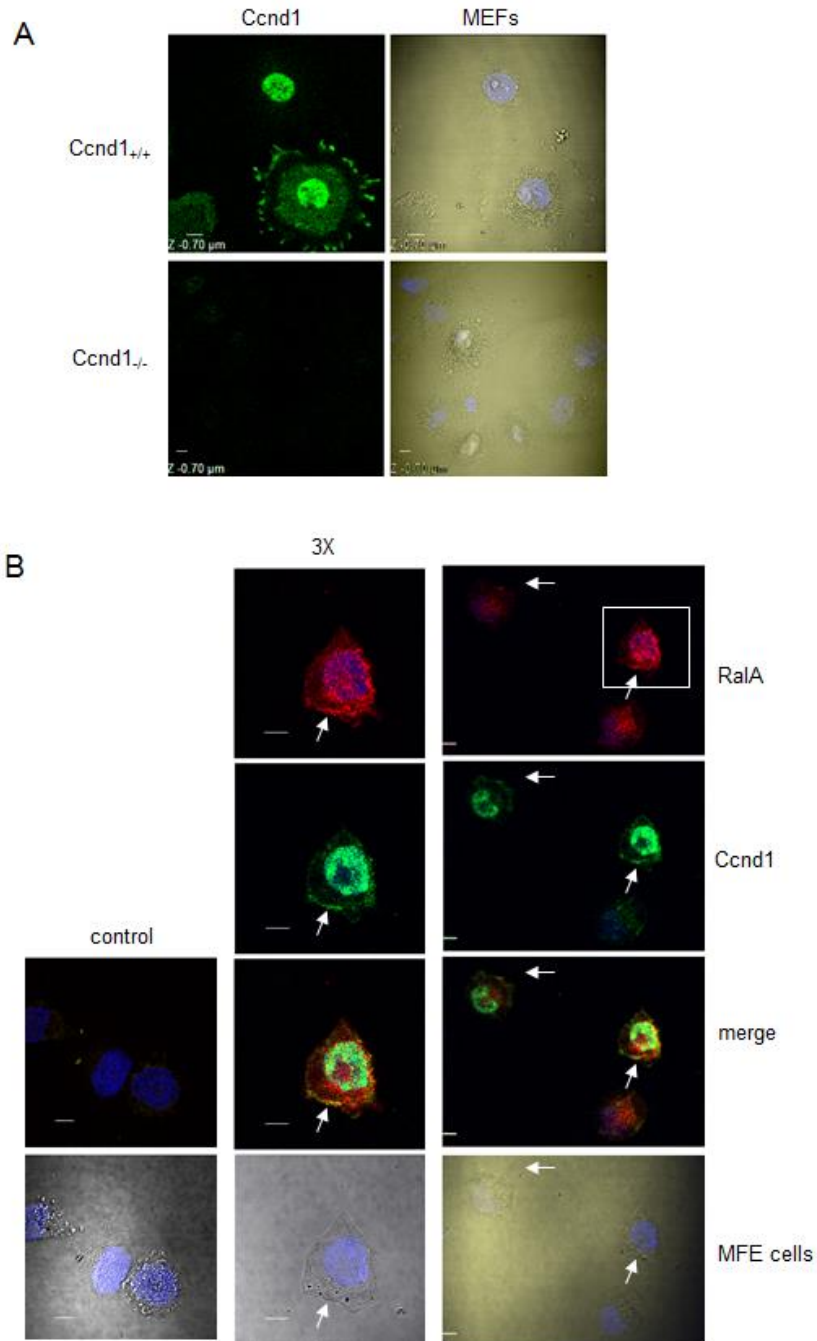

**Supplementary Figure S2. Cyclin D1 is associated to the membranes of fibroblasts and tumor cells during spreading.** (A) Ccnd1<sup>-/-</sup> and Ccnd1<sup>+/+</sup> fibroblasts were fixed in 4% paraformaldehyde and permeabilized with 0.2% Triton X-100. Images were acquired by confocal microscopy (10 μm bar). Nuclei were stained with Hoescht (blue). Anti-Ccnd1 (rabbit monoclonal clone EP12) was used. (B) Images of cultured MFE cells were processed as in A (10 μm bar). Anti-Ccnd1 (EP12) and anti-RalA (mouse monoclonal) antibodies were used. The square shows one of the cells amplified (3x). Arrows indicate the presence of Ccnd1 in the membrane co-localizing with RalA. Cells incubated only with Alexa488 and/or Alexa594-labeled secondary antibodies were used as a control.

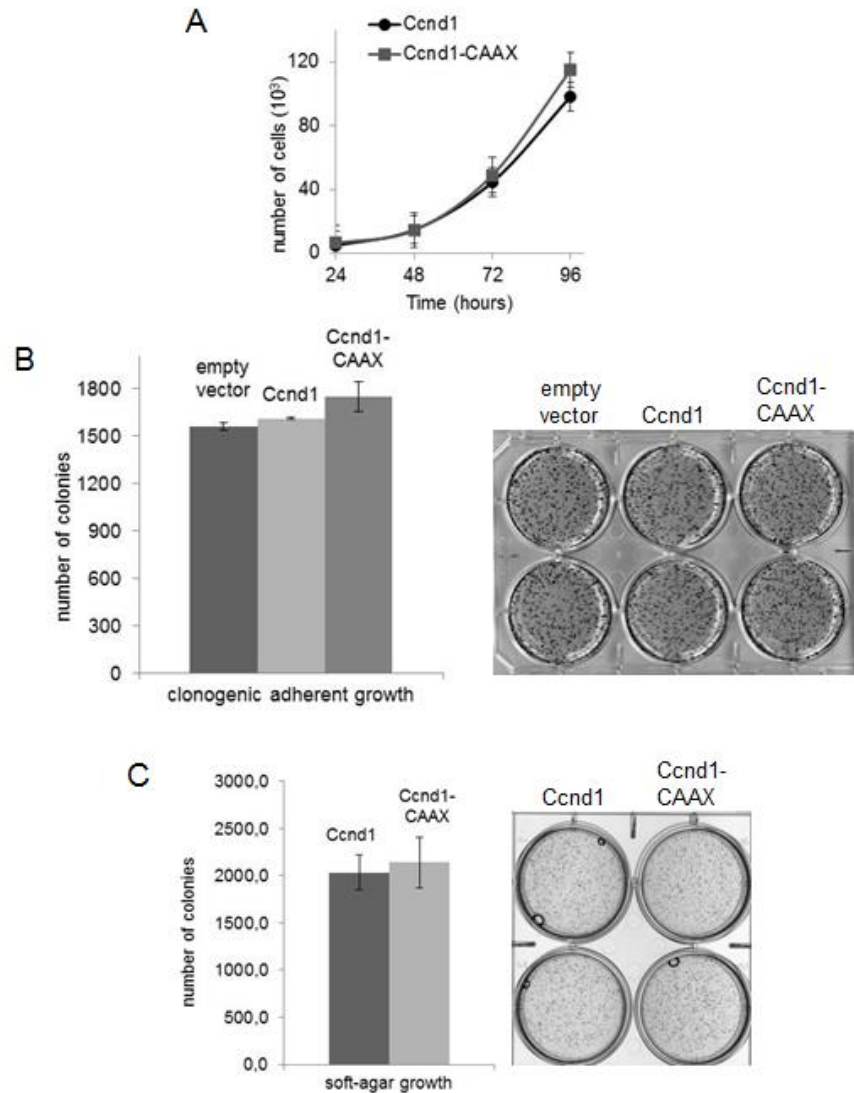

**Supplementary Figure S3. The membrane-associated Ccnd1 does not change the proliferation of tumor cells.** (A) MFE cells were infected with lentiviruses carrying Ccnd1 or Ccnd1-CAAX. Three days after infection cells were plated at  $5 \times 10^3$  cells/cm<sup>2</sup> in 24-well plates and allowed to adhere overnight. Cells were counted every 24 h for 4 days. Growth curves are plotted and each point is the mean  $\pm$  sd from two independent experiments. No significant differences were detected. (B) MFE cells were infected with lentiviruses carrying the empty vector or Ccnd1 or Ccnd1-CAAX. Three days after infection  $10^3$  cells were seeded as a single-cell suspension in 6-well plates. Fifteen days after seeding, colonies were stained (right) and results were plotted as mean  $\pm$  sem (left). No significant differences were detected. (C) MFE cells were infected as in A and three days after infection cells were trypsinized and resuspended in 0.3% agar diluted in medium at a concentration of  $3 \times 10^3$  cells/ml. Fifteen days after plating, colonies were stained (right) and scored as mean  $\pm$  sem (left). No significant differences were detected.

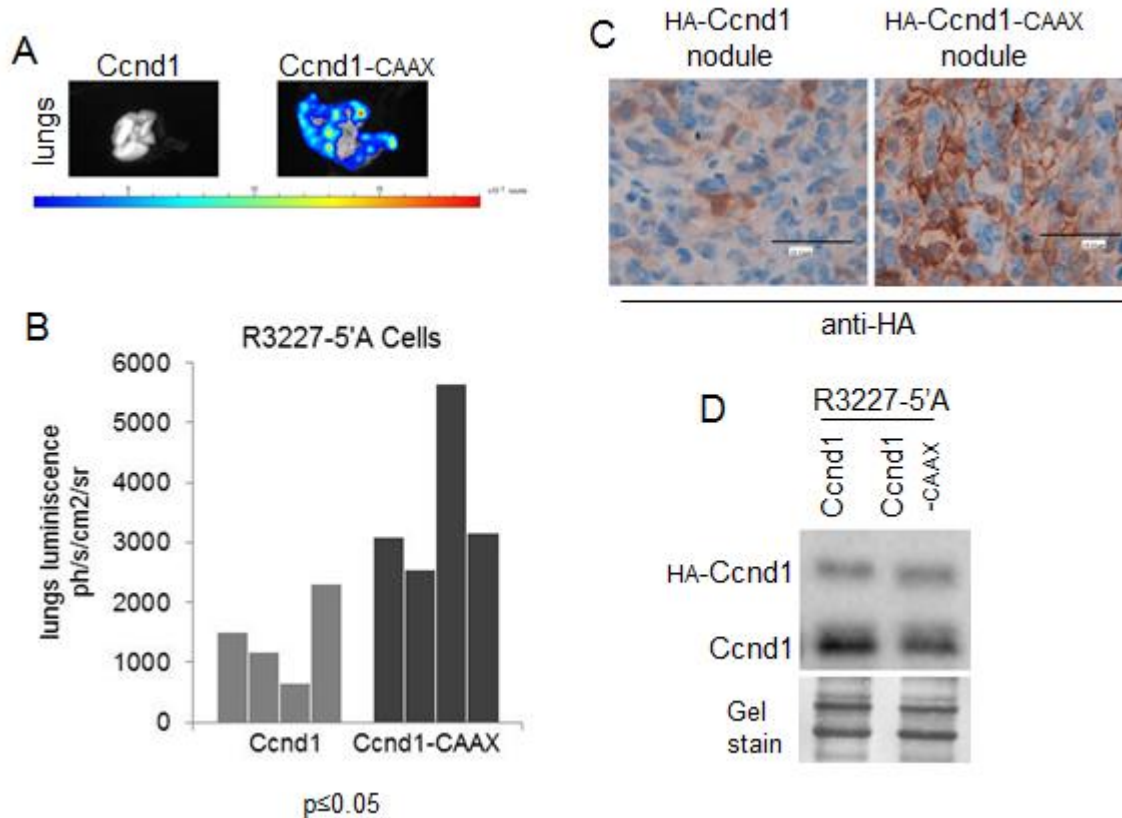

**Supplementary Figure S4. The membrane-associated Ccnd1 enhances lung metastatic activity of prostatic carcinoma cells.** (A) R3227-5'A cells stably expressing luciferase were used for metastasis assay. Only  $2.5 \times 10^4$  cells harboring Ccnd1 or Ccnd1-CAAX were injected in SCID-hairless mice. One week after injection, animals expressing Ccnd1-CAAX enhanced lung metastasis. A representative image of lungs luminescence is shown. (B) The number of lung nodules from four animals in A was inferred from luminescence and represented. Significance values were determined by a Mann-Whitney test. (C) Representative HA-immunohistochemistry images of lung nodules are shown. (D) R3227-5'A cells expressed similar amounts of Ccnd1 or Ccnd1-CAAX. A protein extract was obtained from the cells before injection to the mice, and the amount of Ccnd1 was analyzed by immunoblot. Gel stain was used as a loading control.
